# Supplementary material for: Cognitive Impairments and Plasma Metabolic Characteristics in Deficit Schizophrenia: A Two-Year Follow-Up Longitudinal Study
Source: Research Square preprint supplement (doi:10.21203/rs.3.rs-7033034/v1), 2025-09-17
Supplement: Supplementary file 1 [file b493588ff1c7062594cdfb59.docx]

**Supplementary Materials for**

**Cognitive Impairments and Plasma Metabolic Characteristics in Deficit Schizophrenia: A Two-Year Follow-Up Longitudinal Study**

Chenghao Lu1, Yuxin Han1, Lijun Wang3, Wenjie Sun3, Yeqing Dong1,2, Yanzhe Li1,2, Nannan Liu1,2, Xinxu Wang1,2, Shen Li1,2*, Jie Li1*

The article contains：

Supplementary Methods

Supplementary Table 1

Supplementary Table 2

Supplementary Table 3

Supplementary Table 4

Supplementary Table 5

Supplementary Table 6

Supplementary Figure 1

Supplementary Figure 2

Supplementary Figure 3

Supplementary Figure 4

**Supplementary Methods**

**UHPLC-HRMS analysis**

Untargeted metabolomics primarily detects the dynamic changes of all metabolites within cells, tissues, organs, or entire organisms in an unbiased manner, enabling the identification of differential metabolites and specific metabolic pathways, thereby uncovering the physiological mechanisms underlying related diseases [1, 2]. Ultra-high-performance liquid chromatography-high resolution mass spectrometry has been widely applied in untargeted metabolomics studies of neuropsychiatric disorders due to its advantages of high separation efficiency, sensitivity, resolution, and its capability to perform both quantitative and qualitative analyses [3, 4]. This approach allows for the detection of metabolic differences between groups and the identification of potential diagnostic metabolites.

Plasma samples were submitted to the meta-PhenotyperTM high coverage and precision metabolomics platform, utilizing three analytical methods based on UHPLC-HRMS for comprehensive detection of metabolites and lipids. Metabolomics analyses were conducted on an UltimateTM 3000 UHPLC system coupled with a Q ExactiveTM quadrupole Orbitrap mass spectrometer (Thermo Scientific, San Jose, USA). The first portion of the hydrophilic extract was analyzed on an ACE C18-PFP column (Advanced Chromatography Technologies Ltd, Aberdeen, Scotland) and detected under positive electrospray mode. The second portion was analyzed on an Acquity HSS C18 column (Waters Corporation, Milford, USA) and detected under negative electrospray mode. Lipidomics analyses were performed on the same analytical instrument operating in positive/negative polarity switching mode, with lipid separation achieved on an Accucore C30 core-shell column (Thermo Scientific, Bellefonte, USA). Full-scan mass spectrometry data at 70,000 FWHM resolution, as well as Top 7 or Top 10 data-dependent MS/MS spectra, were acquired using XCalibur software (Thermo Scientific, San Jose, USA). Plasma samples were processed in multiple batches, with each batch including both experimental and QC samples. The QC samples were uniformly inserted into each batch to monitor and correct for potential batch effects, ensuring data consistency across the entire analysis.

**Metabolomic data processing**

The full-scan and data-dependent MS2 metabolic profile data obtained using Method 1 and Method 2 were comprehensively extracted using Compound Discoverer software (Thermo Scientific, San Jose, USA). Structural annotation of hydrophilic metabolites was performed by matching the acquired MS2 data against a proprietary iPhenomeTM SMOL high-resolution MS/MS spectral library created using authentic standards, as well as the mzCloud library (Thermo Scientific, San Jose, USA). Additionally, the exact m/z ± 5 ppm of MS1 spectra was searched against the local Human Metabolome Database (HAMB) [5]. Retention time and high-resolution MS/MS spectral similarity were also used to rigorously confirm the structural annotation of metabolites. The chemical identification results of metabolites and lipids were finally annotated according to the classification criteria proposed by the Metabolomics Standards Initiative (MSI) [6]. Metabolomics data from different measurements were first normalized according to previously described protocols, then trimmed and log-transformed for further data processing [7].

**References**

1. Kennedy, A.D., B.M. Wittmann, A.M. Evans, L.A.D. Miller, D.R. Toal, S. Lonergan, et al., *Metabolomics in the clinic: A review of the shared and unique features of untargeted metabolomics for clinical research and clinical testing.* J Mass Spectrom, 2018. **53**(11): 1143-1154.

2. Di Minno, A., M. Gelzo, M. Stornaiuolo, M. Ruoppolo, and G. Castaldo, *The evolving landscape of untargeted metabolomics.* Nutr Metab Cardiovasc Dis, 2021. **31**(6): 1645-1652.

3. Beger, R.D., R. Goodacre, C.M. Jones, K.A. Lippa, O.A. Mayboroda, D. O'Neill, et al., *Analysis types and quantification methods applied in UHPLC-MS metabolomics research: a tutorial.* Metabolomics, 2024. **20**(5): 95.

4. Jia, L., J. Yang, M. Zhu, Y. Pang, Q. Wang, Q. Wei, et al., *A metabolite panel that differentiates Alzheimer's disease from other dementia types.* Alzheimers Dement, 2022. **18**(7): 1345-1356.

5. Wishart, D.S., A. Guo, E. Oler, F. Wang, A. Anjum, H. Peters, et al., *HMDB 5.0: the Human Metabolome Database for 2022.* Nucleic Acids Res, 2022. **50**(D1): D622-d631.

6. Sumner, L.W., A. Amberg, D. Barrett, M.H. Beale, R. Beger, C.A. Daykin, et al., *Proposed minimum reporting standards for chemical analysis Chemical Analysis Working Group (CAWG) Metabolomics Standards Initiative (MSI).* Metabolomics, 2007. **3**(3): 211-221.

7. Fan, S., T. Kind, T. Cajka, S.L. Hazen, W.H.W. Tang, R. Kaddurah-Daouk, et al., *Systematic Error Removal Using Random Forest for Normalizing Large-Scale Untargeted Lipidomics Data.* Anal Chem, 2019. **91**(5): 3590-3596.

**Supplementary Tables**

**Supplementary Table 1.** Antipsychotics medication status of the participants.

| Medication | DS (n = 51) | |  | NDS (n = 75) | |
| --- | --- | --- | --- | --- | --- |
|  | Number | Proportion |  | Number | Proportion |
| Atypical Antipsychotics |  |  |  |  |  |
| Clozapine | 14 | 15.91% |  | 17 | 12.14% |
| Olanzapine | 20 | 22.73% |  | 37 | 26.43% |
| Risperidone | 25 | 28.41% |  | 37 | 26.43% |
| Aripiprazole | 5 | 5.68% |  | 8 | 5.71% |
| Quetiapine | 11 | 12.50% |  | 16 | 11.43% |
| Amisulpride | 5 | 5.68% |  | 9 | 6.43% |
| Ziprasidone | 1 | 1.14% |  | 0 | 0% |
| Perospirone | 2 | 2.27% |  | 3 | 2.14% |
| Lurasidone | 0 | 0% |  | 1 | 0.71% |
| Blonanserin | 1 | 1.14% |  | 2 | 1.43% |
| Typical Antipsychotics |  |  |  |  |  |
| Chlorpromazine | 4 | 4.55% |  | 10 | 7.14% |

**Abbreviations:** DS, Deficit schizophrenia; NDS, Nondeficit schizophrenia.

**Supplementary Table 2.** Antipsychotics monotherapy versus combination therapy.

| Treatment mode | DS (n = 51) | NDS（n = 75） |
| --- | --- | --- |
| Monotherapy | 25 | 32 |
| Combination therapy | 26 | 43 |
| F | 0.50 | |
| *p*-value | 0.482 | |

**Abbreviations:** DS, Deficit schizophrenia; NDS, Nondeficit schizophrenia.

**Supplementary Table 3.** Impaired metabolic pathways in DS.

| Metabolic pathway | Impact | *p*-value | -log(*p*-value) |
| --- | --- | --- | --- |
| Histidine metabolism | **0.17213** | **0.0049** | 2.306 |
| Alanine, aspartate and glutamate metabolism | **0.13462** | **0.0149** | 1.827 |
| Lysine degradation | **0.11247** | **0.0170** | 1.770 |
| Valine, leucine and isoleucine biosynthesis | 0 | 0.0541 | 1.267 |
| Ascorbate and aldarate metabolism | 0 | 0.0606 | 1.217 |
| Pentose and glucuronate interconversions | 0.10843 | 0.1241 | 0.906 |
| Pantothenate and CoA biosynthesis | 0 | 0.1302 | 0.885 |
| Arginine and proline metabolism | 0.04651 | 0.2231 | 0.652 |
| Pyrimidine metabolism | 0.05835 | 0.2394 | 0.621 |
| Valine, leucine and isoleucine degradation | 0.01084 | 0.2448 | 0.611 |
| Tryptophan metabolism | 0 | 0.2502 | 0.602 |

**Abbreviations:** DS, Deficit schizophrenia. Bold values indicate *p* < 0.05.

**Supplementary Table 4.** The detailed parameters of LASSO.

| Metabolites | Lamda.1se |
| --- | --- |
| Succinylcarnitine (AcCa(4:0-DC)) | -0.0639 |
| Arachidonoylcarnitine (AcCa(20:4)) | 0.0000 |
| N-Acetylaspartylglutamic acid | 0.1590 |
| N-Acetylputrescine | 0.0000 |
| Pipecolic acid | 0.1908 |
| Urocanic acid | -0.0836 |
| N-Acetylglutamine | -0.7063 |
| Indoleacetic acid | 0.0000 |
| N-Acetylthreonine | -0.1411 |
| Formiminoglutamic acid | 0.0000 |
| N-Acetyl-L-aspartic acid | 0.0473 |
| Glycochenodeoxycholic acid 3-glucuronide | 0.0000 |
| Glucose + myo-Inositol | 0.0470 |
| 2-tert Butylhydroquinone sulfate | 0.2194 |
| 3-(3-Hydroxyphenyl) propionic acid | 0.0000 |
| Benzeneacetamide-4-O-sulphate | -0.0526 |
| 4-Hydroxychlorothalonil | -0.1753 |
| Lauroyl-ethanolamine | 0.0000 |
| Aminoadipic acid | -0.2526 |
| Hydrocinnamic acid | -0.1374 |
| Desaminotyrosine | 0.0496 |
| 3-Hydroxyhippuric acid | 0.0360 |
| alpha-Ketoisovaleric acid | 0.2843 |
| Ile-Ile | 0.0000 |
| gamma-Glu-Thr | -0.0498 |
| N6-Methyladenosine | 0.2120 |
| Thymidine | 0.1302 |
| Pregnanolone sulfate | 0.0077 |
| M1X-RT511MZ302 | 0.0000 |
| M1X-RT455MZ318 | 0.0000 |
| M2X-RT379MZ437 | 0.0000 |
| M2X-RT37MZ197 | 0.0000 |
| M2X-RT34MZ215 | 0.0000 |
| M2X-RT241MZ259 | 0.0000 |

**Abbreviations:** LASSO, Least Absolute Shrinkage and Selection Operator. The lamda_1se of differentially expressed metabolites from LASSO models comparing deficit and nondeficit schizophrenia.

**Supplementary Table 5.** The AUC values of 57 differentially expressed metabolites used to distinguish between DS and NDS.

| Metabolites | AUC |
| --- | --- |
| Succinylcarnitine (AcCa(4:0-DC)) | 0.603 |
| N-Acetylaspartylglutamic acid | 0.368 |
| Pipecolic acid | 0.365 |
| Urocanic acid | 0.602 |
| N-Acetylglutamine | 0.611 |
| N-Acetylthreonine | 0.607 |
| N-Acetyl-L-aspartic acid | 0.402 |
| Glucose + myo-Inositol | 0.359 |
| 2-tert Butylhydroquinone sulfate | 0.357 |
| Benzeneacetamide-4-O-sulphate | 0.616 |
| 4-Hydroxychlorothalonil | 0.584 |
| Aminoadipic acid | 0.606 |
| Hydrocinnamic acid | 0.627 |
| Desaminotyrosine | 0.373 |
| 3-Hydroxyhippuric acid | 0.359 |
| alpha-Ketoisovaleric acid | 0.382 |
| gamma-Glu-Thr | 0.662 |
| N6-Methyladenosine | 0.401 |
| Thymidine | 0.378 |
| Pregnanolone sulfate | 0.425 |

**Abbreviations:** AUC, Area under the curve**;** DS, Deficit schizophrenia; NDS, Nondeficit schizophrenia.

**Supplementary Table 6.** Log-transformed plasma levels of metabolites associated with differentiating DS and NDS.

|  | DS (n = 51) | NDS (n = 75) | F | *p*-value |
| --- | --- | --- | --- | --- |
| Succinylcarnitine (AcCa(4:0-DC)) | 20.80 ± 0.50 | 20.58 ± 0.62 | 4.10 | **0.045** |
| N-Acetylaspartylglutamic acid | 15.08 ± 1.71 | 15.87 ± 1.40 | 8.00 | **0.005** |
| Pipecolic acid | 27.62 ± 0.57 | 27.93 ± 0.68 | 7.33 | **0.008** |
| Urocanic acid | 23.19 ± 0.84 | 22.90 ± 0.77 | 3.92 | 0.050 |
| N-Acetylglutamine | 27.35 ± 0.26 | 27.24 ± 0.30 | 4.78 | **0.031** |
| N-Acetylthreonine | 17.92 ± 0.78 | 17.54 ± 0.85 | 6.42 | **0.013** |
| N-Acetyl-L-aspartic acid | 21.87 ± 1.06 | 22.25 ± 1.03 | 4.29 | **0.040** |
| Glucose + myo-Inositol | 16.36 ± 3.72 | 18.29 ± 3.82 | 7.86 | **0.006** |
| 2-tert Butylhydroquinone sulfate | 17.90 ± 1.48 | 18.68 ± 1.28 | 9.82 | **0.002** |
| Benzeneacetamide-4-O-sulphate | 22.63 ± 0.74 | 22.32 ± 0.88 | 4.14 | **0.044** |
| 4-Hydroxychlorothalonil | 17.79 ± 0.83 | 17.35 ± 1.30 | 4.49 | **0.036** |
| Aminoadipic acid | 25.62 ± 1.29 | 25.14 ± 0.88 | 6.22 | **0.014** |
| Hydrocinnamic acid | 20.44 ± 1.26 | 19.97 ± 1.12 | 4.78 | **0.031** |
| Desaminotyrosine | 17.69 ± 0.93 | 18.10 ± 0.89 | 6.22 | **0.014** |
| 3-Hydroxyhippuric acid | 19.47 ± 2.29 | 20.49 ± 1.76 | 8.05 | **0.005** |
| alpha-Ketoisovaleric acid | 24.09 ± 0.44 | 24.25 ± 0.36 | 4.74 | **0.031** |
| gamma-Glu-Thr | 25.40 ± 1.33 | 24.52 ± 1.51 | 11.46 | **0.001** |
| N6-Methyladenosine | 20.05 ± 0.78 | 20.36 ± 0.84 | 4.22 | **0.042** |
| Thymidine | 11.36 ± 0.65 | 11.73 ± 0.92 | 6.10 | **0.015** |
| Pregnanolone sulfate | 17.95 ± 0.96 | 18.39 ± 1.16 | 4.98 | **0.027** |

**Abbreviations:** DS, Deficit schizophrenia; NDS, Nondeficit schizophrenia.

**Supplementary Figures**


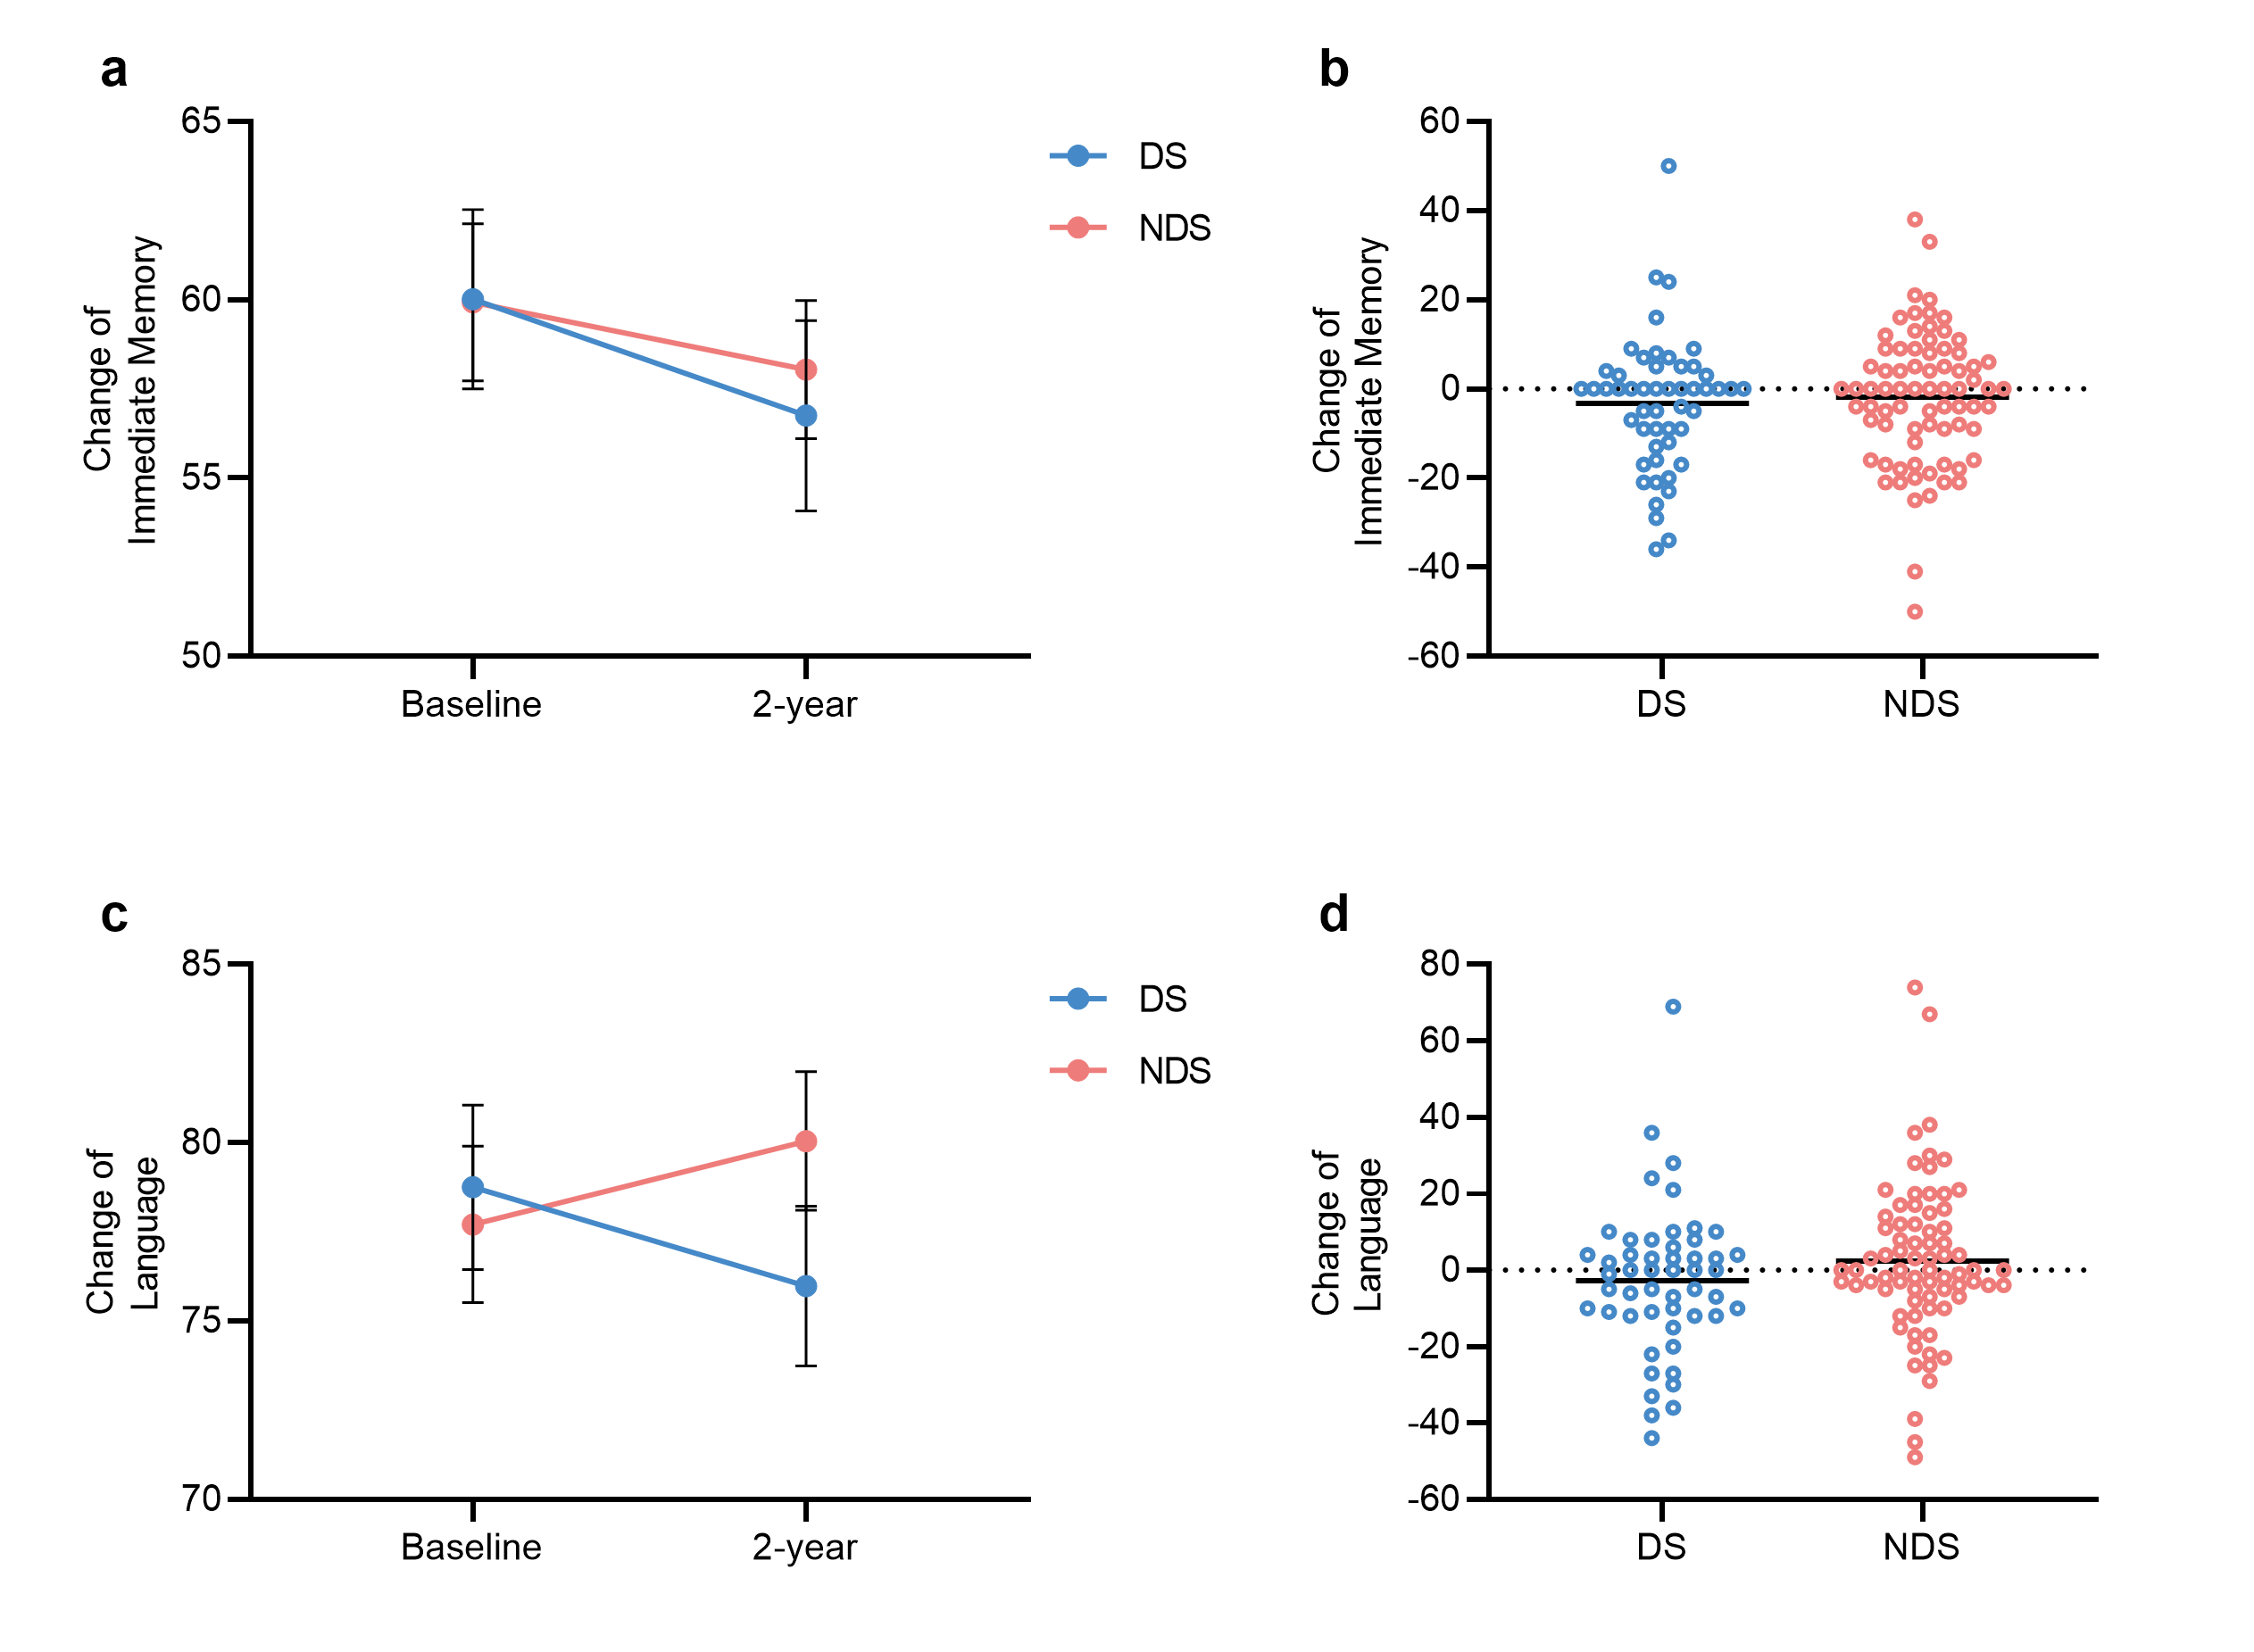


**Supplementary Figure 1.** Cognitive function changes: Comparison between the DS and NDS groups at baseline and 2-year follow-up.

**Abbreviations:** DS, Deficit schizophrenia; NDS, Nondeficit schizophrenia. **p* < 0.05, ***p* < 0.01, ****p* < 0.001


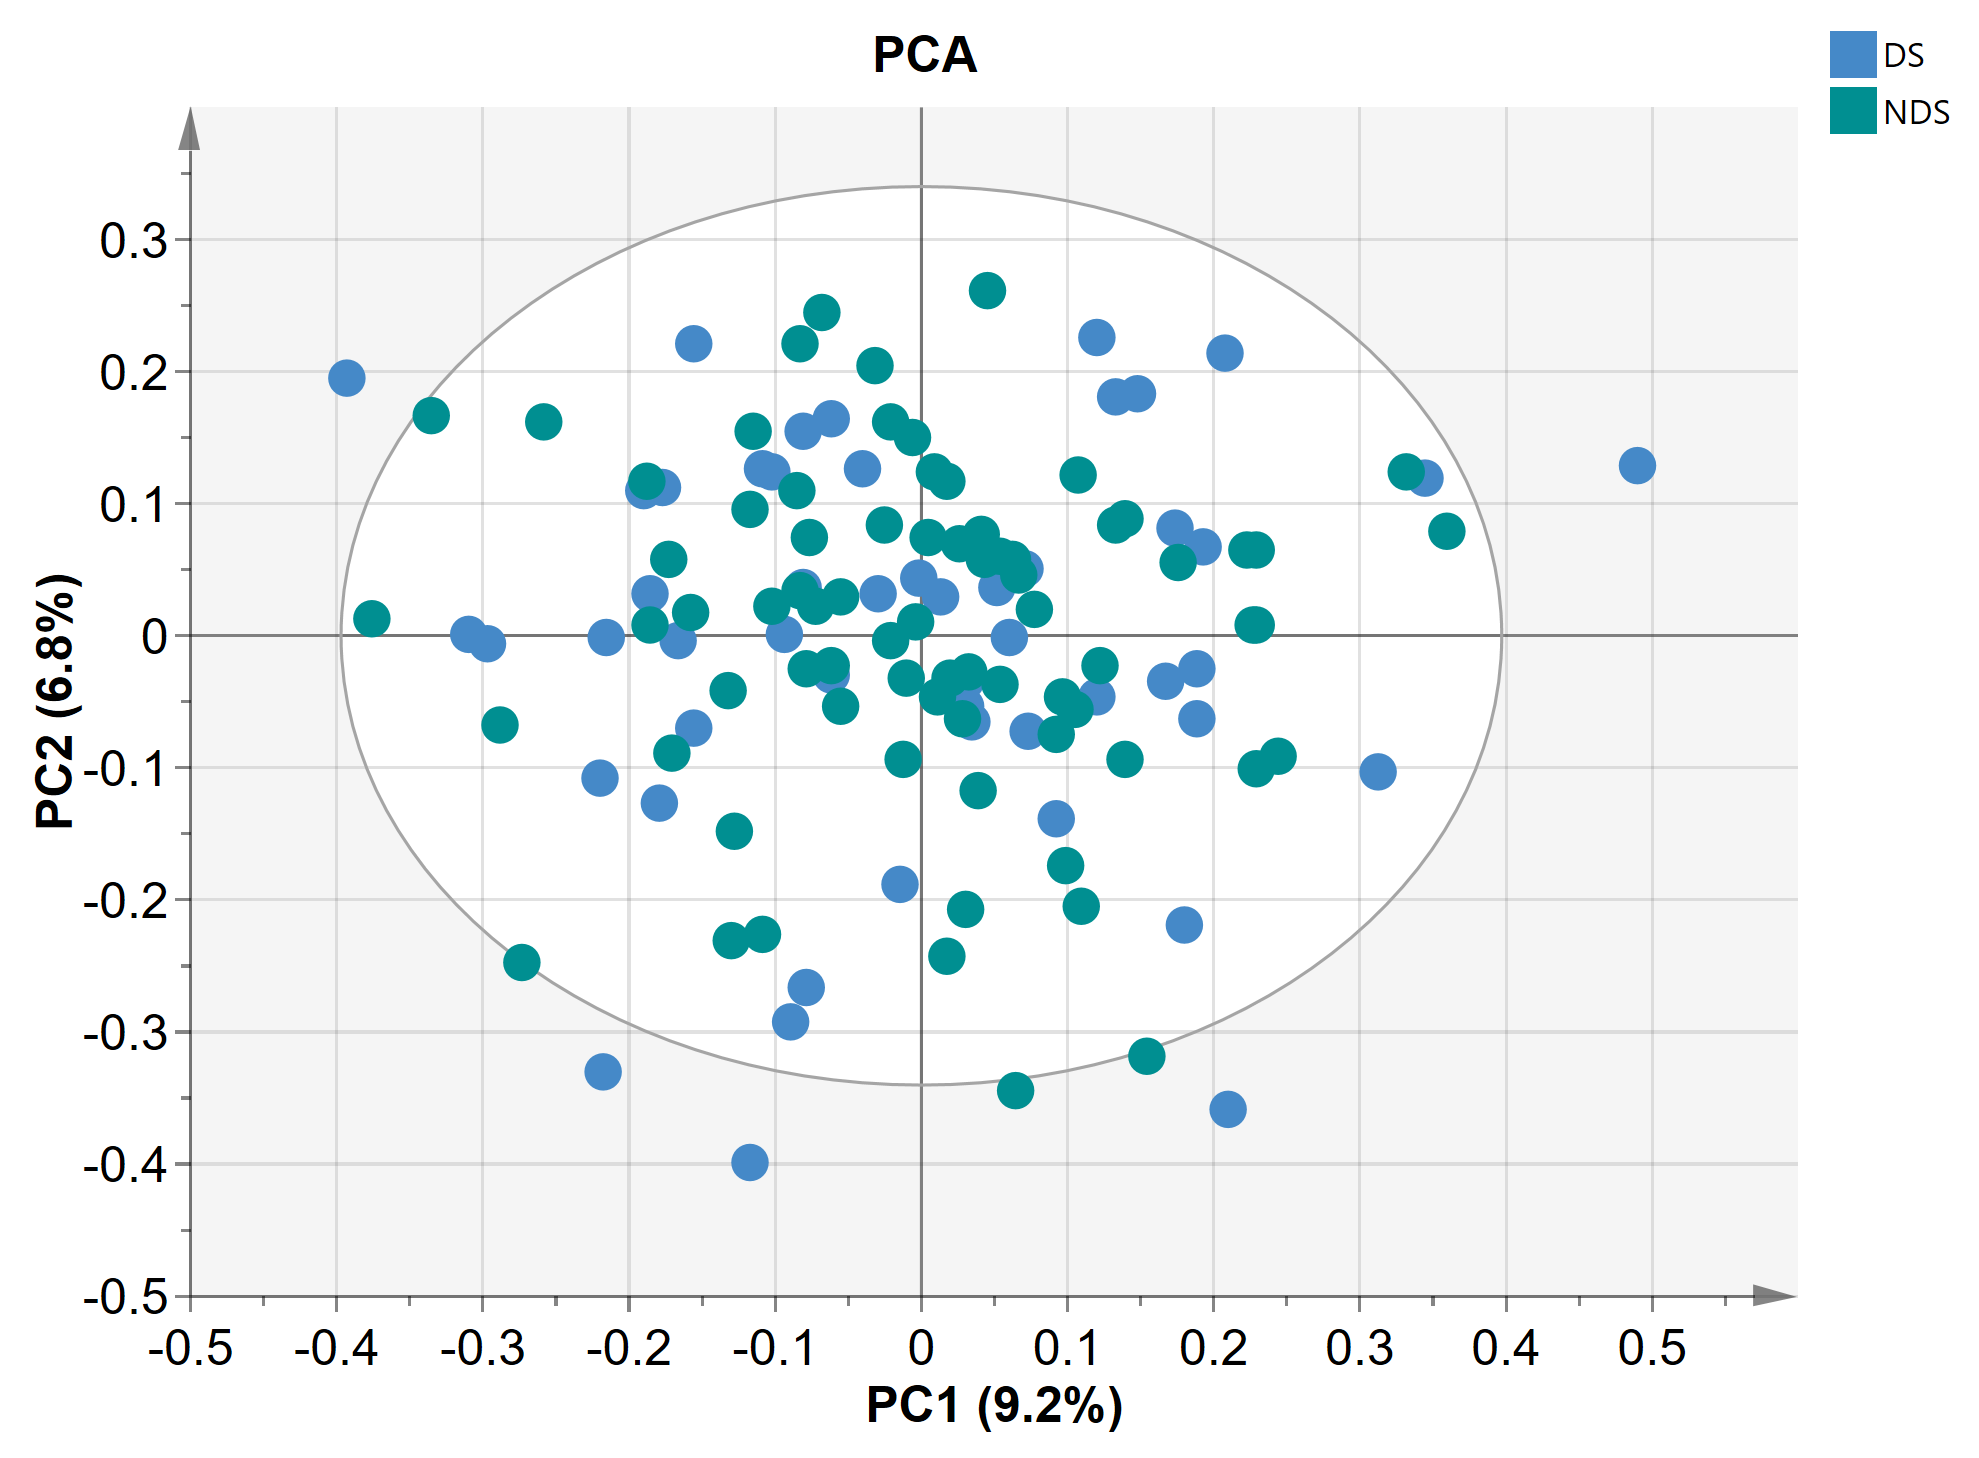


**Supplementary Figure 2.** PCA plot of plasma metabolomic profiles between DS and NDS groups.

**Abbreviations:** PCA, Principal components analysis; DS, Deficit schizophrenia; NDS, Nondeficit schizophrenia.


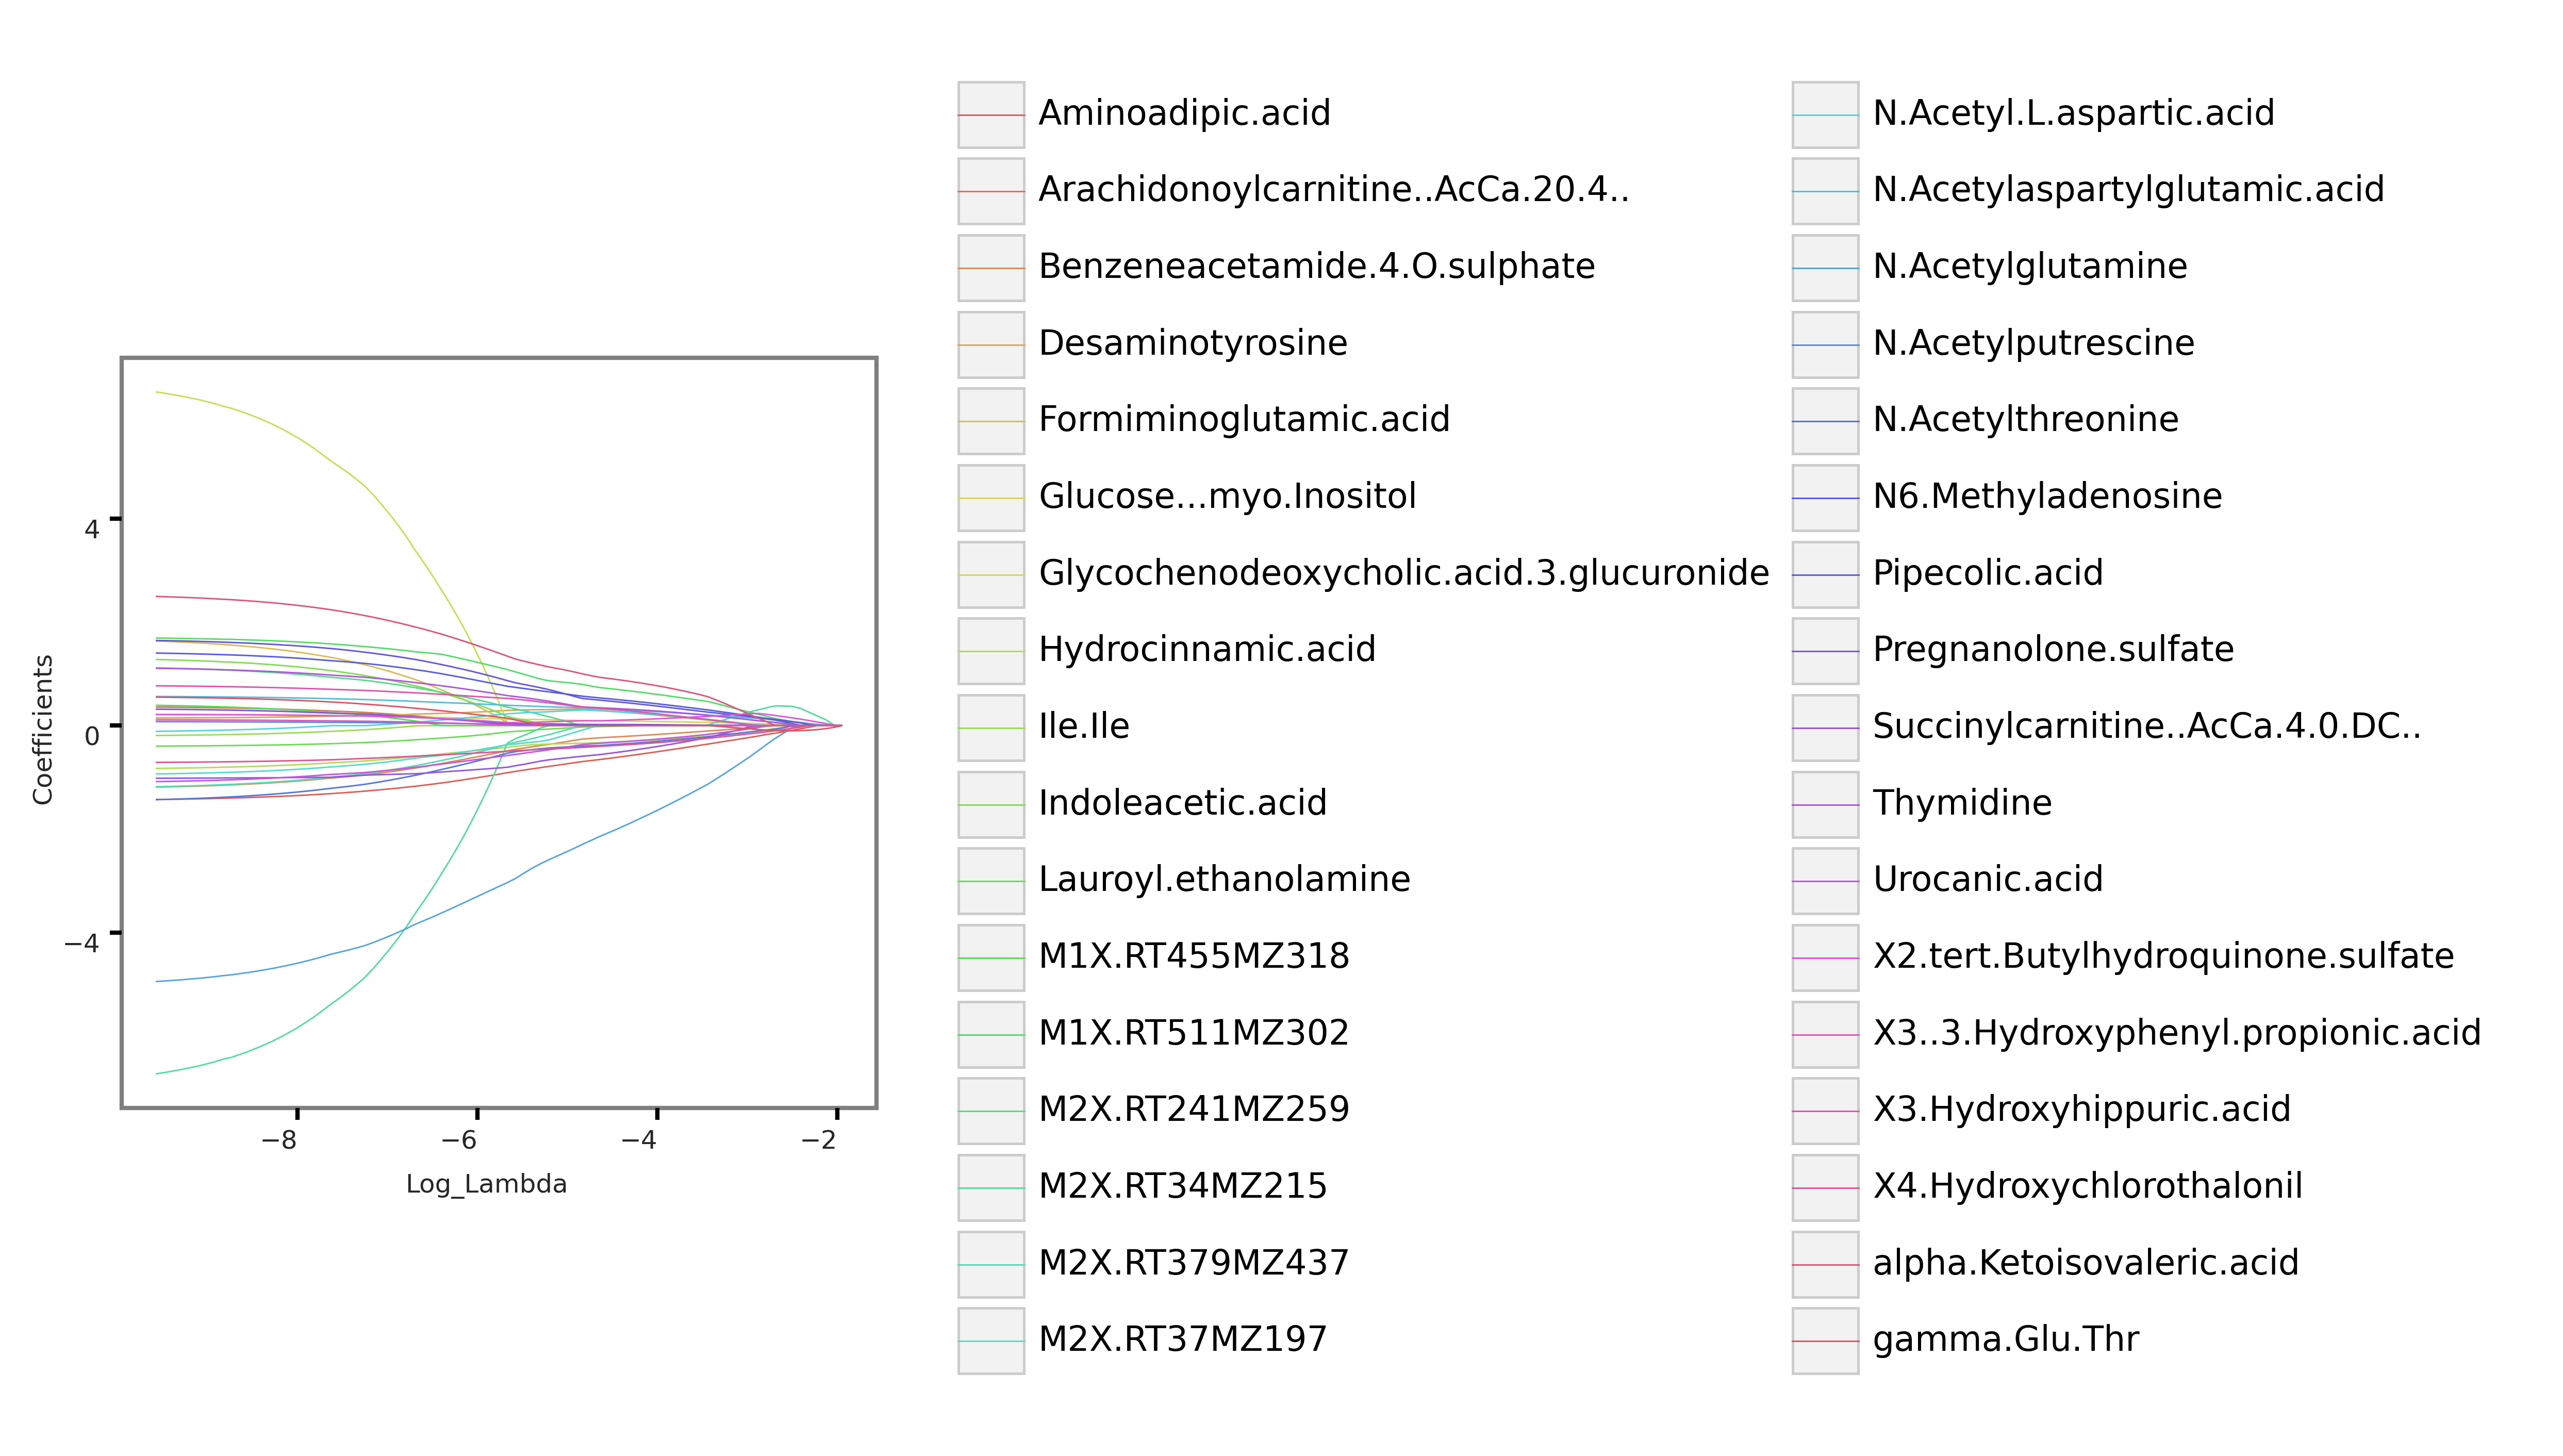


**Supplementary Figure 3.** LASSO coefficient paths for metabolite selection.

**Abbreviations:** LASSO,Least Absolute Shrinkage and Selection Operator.


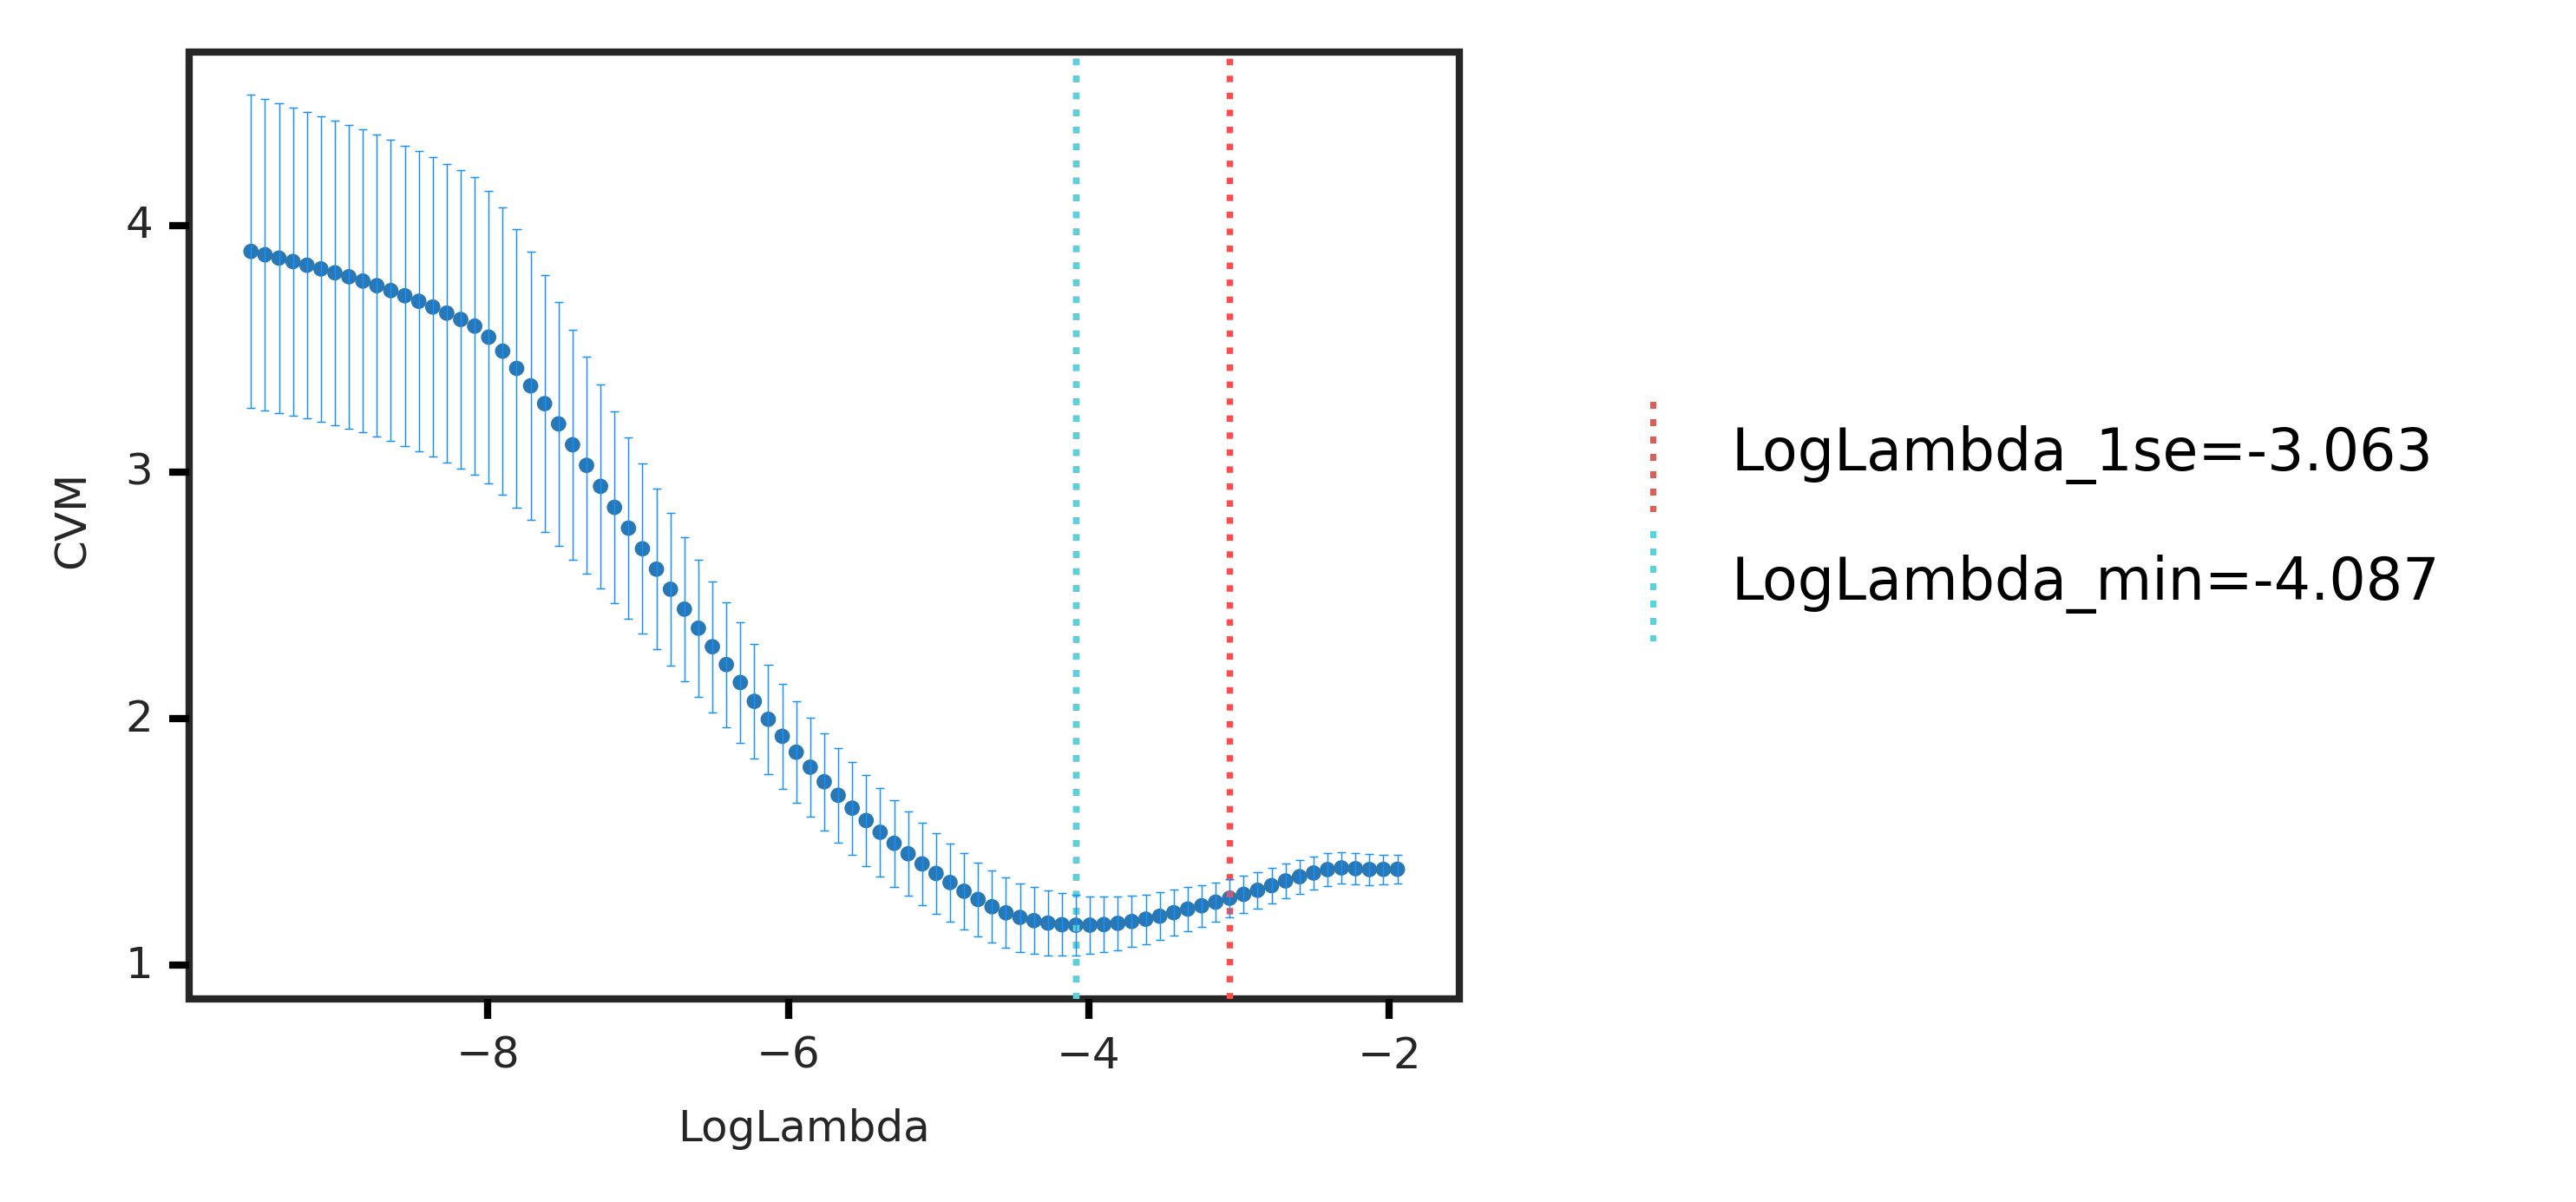


**Supplementary Figure 4.** LASSO regression cross-validation curve for metabolite selection.

**Abbreviations:** LASSO,Least Absolute Shrinkage and Selection Operator.
